# Supplementary material for: Phosphorescence emission and fine structures observed respectively under ambient conditions and at ca. 55 K in a coordination polymer of lead(ii)-thiophenedicarboxylate
Source: Royal Society of Chemistry journal article supplement (doi:10.1039/c8dt01951g), 2018-01-01
Supplement: c8dt01951g1.pdf [file c8dt01951g1.pdf]

## Supporting Information

### Phosphorescence emission and fine structure observed respectively at ambient condition and *ca.* 55 K in a coordination polymer of lead(II)-thiophenedicarboxylate

Jin-Yu He,<sup>a</sup> Zheng-Rong Deng,<sup>a</sup> Xiao Liu,<sup>a</sup> Yin Qian,<sup>a</sup> Yang Zou,<sup>a\*</sup> Xiao-Ming Ren<sup>a,b,c</sup>

<sup>a</sup> State Key Laboratory of Materials-Oriented Chemical Engineering and College of Chemistry and Molecular Engineering, Nanjing Tech University, Nanjing 210009, P. R. China.

E-mail: [zouyang@njtech.edu.cn](mailto:zouyang@njtech.edu.cn), [xmren@njtech.edu.cn](mailto:xmren@njtech.edu.cn)

<sup>b</sup> State Key Lab & Coordination Chemistry Institute, Nanjing University, Nanjing 210093, P. R. China

<sup>c</sup> College of Materials Science and Engineering, Nanjing Tech University, Nanjing 210009, P. R. China

#### Contents

**Table S1:** Selected bond lengths (Å) and angles (°) in crystal of CP1.

**Table S2:** Comparison of bond lengths (Å) and angles (°) in the geometry optimization and single crystal structures of CP1.

**Fig. S1:** IR spectrum of **1** recorded from a KBr pellet.

**Fig. S2:** Coordination mode of Pb<sup>II</sup> in CP1.

**Fig. S3:** 2D layer structure constructed by PbO<sub>8</sub> unit.

**Fig. S4:** The relationship of adjacent thiophene ring in CP1.

**Fig. S5:** UV–visible spectra of CP1 in the solid state at room temperature.

**Fig. S6:** The solid state photoluminescence emission spectra of H<sub>2</sub>TDC at room temperature.

**Fig. S7** Temperature-dependent (10–300 K) solid-state emission spectra of CP1 excited under UV light with  $\lambda_{\text{ex}} = 250$  nm.

**Fig. S8** Emission decay of H<sub>2</sub>TDC obtained at room temperature upon pulsed excitation at 292 nm, where the red lines and the black squares represent the fitting curves and the experimental data.

**Fig. S9:** PDOS of Pb<sup>2+</sup> ions near the Fermi level in CP1.

**Table S1.** Selected Bond Lengths (Å) and Bond Angles (°) for CP1.

|           |           |               |          |
|-----------|-----------|---------------|----------|
| Pb1-O1    | 2.660(13) | O1-Pb1-Ii     | 85.6(4)  |
| Pb1-O1i   | 2.527(15) | O1-Pb1-O2ii   | 108.3(5) |
| Pb1-O1iv  | 2.527(15) | O1-Pb1-O2iii  | 71.8(5)  |
| Pb1-O1v   | 2.660(13) | O1-Pb1-O1iv   | 94.4(4)  |
| Pb1-O2ii  | 2.660(16) | O1-Pb1-O1v    | 180.00   |
| Pb1-O2iii | 2.660(16) | O1i-Pb1-O2ii  | 91.0(5)  |
| Pb1-O2vi  | 3.050(10) | O1v-Pb1-O2iii | 89.0(5)  |

**Symmetry transformations used to generate equivalent atoms:**

$i = x, -y, -1/2+z$ ;  $ii = x, 1-y, -1/2+z$ ;  $iii = 1/2-x, -1/2+y, 1/2-z$ ;  $iv = 1/2-x, 1/2+y, 1/2-z$ ;  $v = 1/2-x, 1/2-y, -z$ ;  $vi = x, -y, 1/2+z$

**Table S2:** Comparison of bond lengths (Å) and angles (°) in the geometry optimization and single crystal structures of CP1.

| MOF-1         |           | OPT-1         |        |
|---------------|-----------|---------------|--------|
| Pb1-O1        | 2.660(13) | Pb1-O1        | 2.6171 |
| Pb1-O1i       | 2.527(15) | Pb1-O1i       | 2.5608 |
| Pb1-O2ii      | 2.660(16) | Pb1-O2ii      | 2.6118 |
| Pb1-O2iii     | 2.660(16) | Pb1-O2iii     | 2.6118 |
| Pb1-O1iv      | 2.527(15) | Pb1-O1iv      | 2.5608 |
| Pb1-O1v       | 2.660(13) | Pb1-O1v       | 2.6171 |
| S1-C2         | 1.666(16) | S1-C2         | 1.7059 |
|               |           |               |        |
| O1-Pb1-O1i    | 85.6(4)   | O1-Pb1-Ii     | 86.00  |
| O1-Pb1-O2ii   | 108.3(5)  | O1-Pb1-O2ii   | 107.24 |
| O1-Pb1-O2iii  | 71.8(5)   | O1-Pb1-O2iii  | 72.76  |
| O1-Pb1-O1iv   | 94.4(4)   | O1-Pb1-O1iv   | 94.00  |
| O1-Pb1-O1v    | 180.00    | O1-Pb1-O1v    | 180.00 |
| O1i-Pb1-O2ii  | 91.0(5)   | O1i-Pb1-O2ii  | 89.37  |
| O1i-Pb1-O2iii | 89.0(5)   | O1i-Pb1-O2iii | 90.63  |

**Symmetry transformations used to generate equivalent atoms:**

$i = x, -y, -1/2+z$ ;  $ii = x, 1-y, -1/2+z$ ;  $iii = 1/2-x, -1/2+y, 1/2-z$ ;  $iv = 1/2-x, 1/2+y, 1/2-z$ ;  $v = 1/2-x, 1/2-y, -z$ ;  $vi = x, -y, 1/2+z$

[1] G. M. Sheldrick, SHELXTL, Structure Determination Software Suite, Bruker AXS, Madison, WI, 2003.

[2] A. L. Spek, PLATON, A multipurpose crystallographic tool, Utrecht University, The Netherlands, 2001.

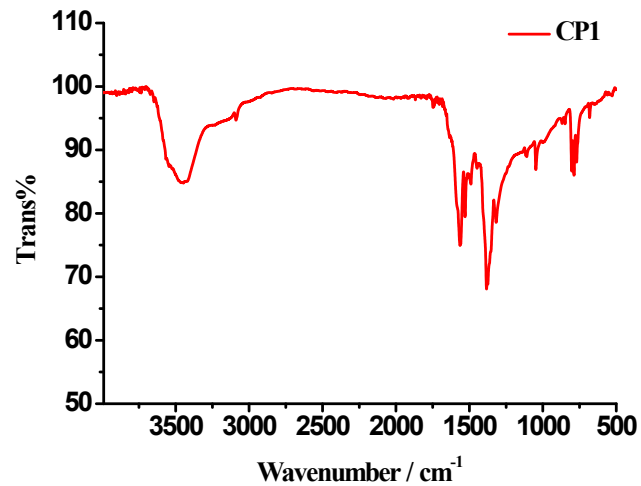

Fig. S1: IR spectrum of CP1 recorded from a KBr pellet.

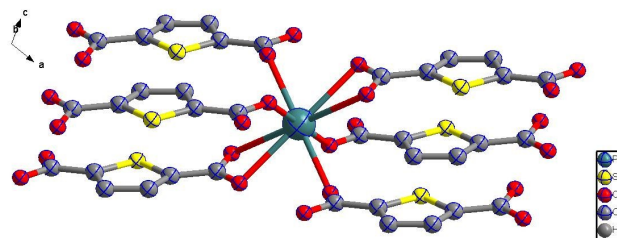

Fig. S2: Coordination mode of Pb<sup>II</sup> in CP1.

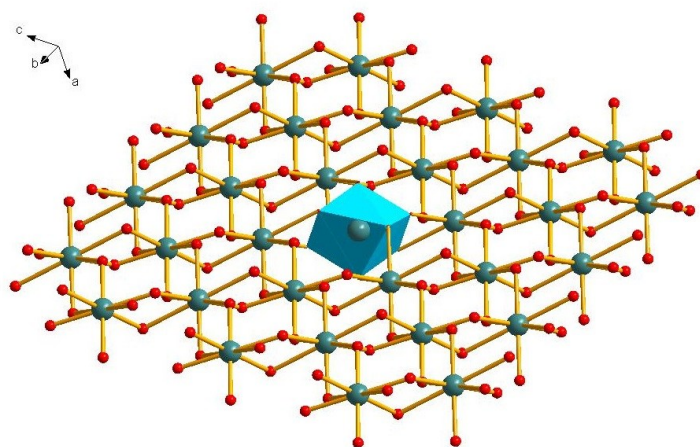

**Fig. S3:** 2D layer structure constructed by  $\text{PbO}_8$  unit.

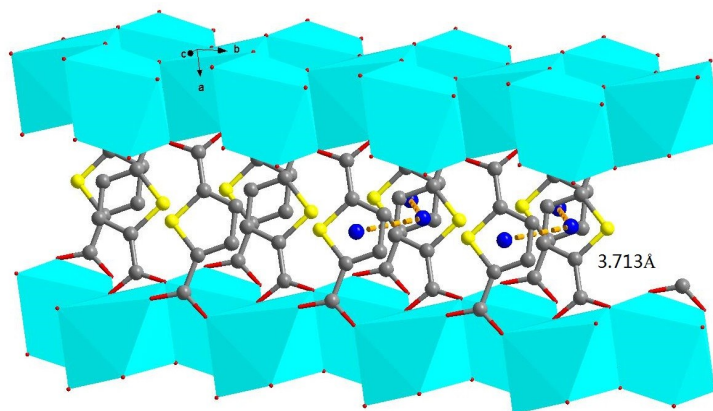

**Fig. S4:** The relationship of adjacent thiophene ring in CP1

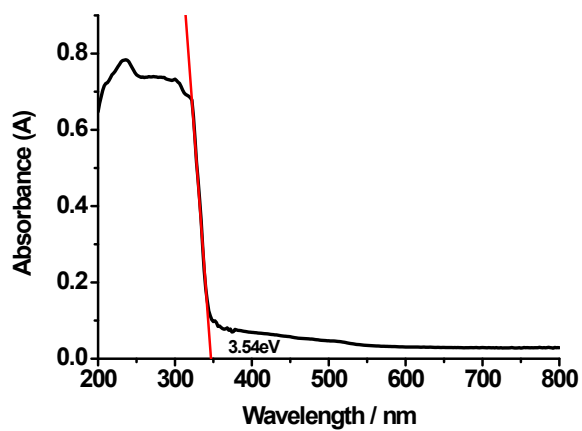

**Fig. S5:** UV-visible spectra of CP1 in the solid state at room temperature.

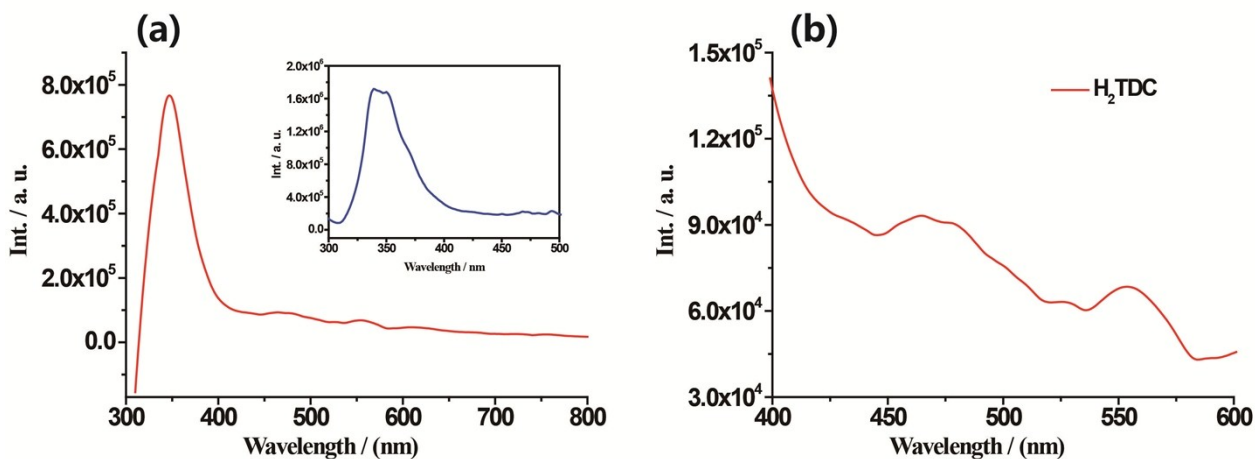

**Fig. S6:** The solid state photoluminescence emission spectra of H<sub>2</sub>TDC at room temperature with excite spectra as insert.

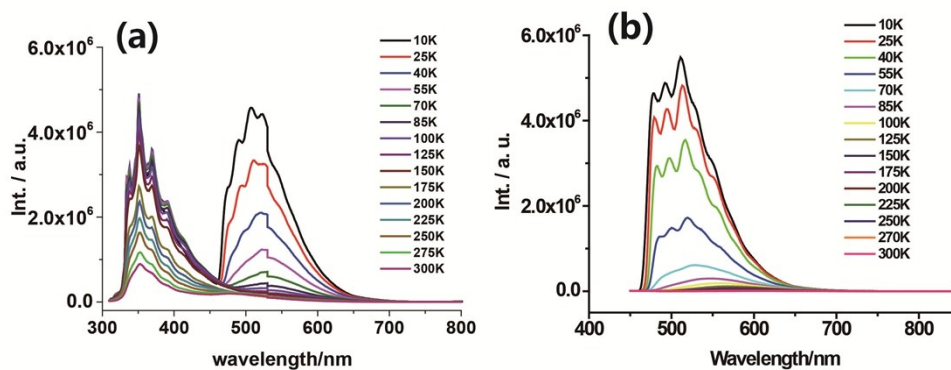

**Fig. S7** Temperature-dependent (10–300 K) solid-state emission spectra of H<sub>2</sub>TDC excited under UV light with  $\lambda_{\text{ex}} = 292$  nm (a) and CP1 excited under UV light with  $\lambda_{\text{ex}} = 250$  nm(b).

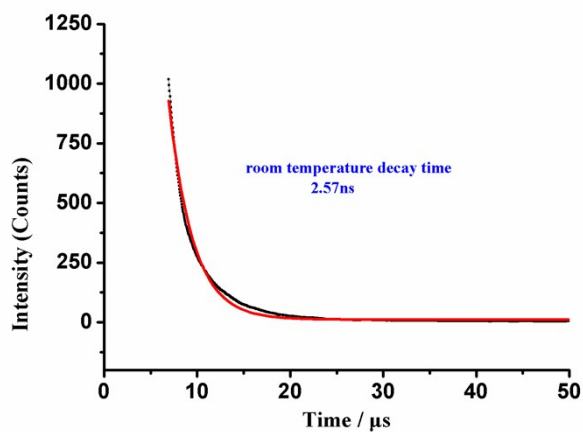

**Fig. S8** Emission decay of  $\text{H}_2\text{TDC}$  (around 555nm) obtained at room temperature upon pulsed excitation at 292 nm, where the red lines and the black squares represent the fitting curves and the experimental data.

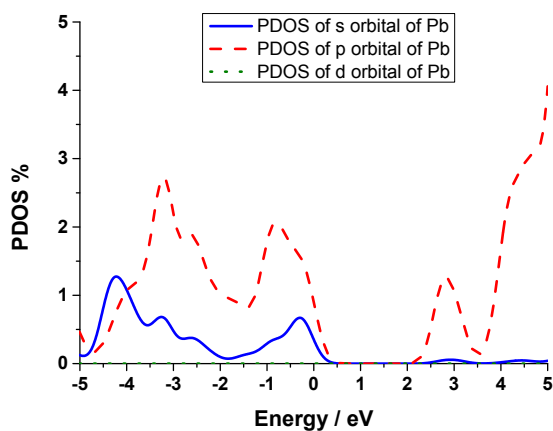

**Fig. S9:** PDOS of  $\text{Pb}^{2+}$  ions near the Fermi level in CP1.
